- and expression of opioid genes in the spinal cord and dorsal root ganglia in neuropathic and inflammatory pain. *Pain* 2009; 141:283–91
62. Hill CE, Harrison BJ, Rau KK, Hougland MT, Bunge MB, Mendell LM, Petruska JC: Skin incision induces expression of axonal regeneration-related genes in adult rat spinal sensory neurons. *J Pain* 2010; 11:1066–73
  63. Lebovitz EE, Keller JM, Kominsky H, Kaszas K, Maric D, Iadarola MJ: Positive allosteric modulation of TRPV1 as a novel analgesic mechanism. *Mol Pain* 2012; 8:70
  64. Suter MR, Berta T, Gao YJ, Decosterd I, Ji RR: Large A-fiber activity is required for microglial proliferation and p38 MAPK activation in the spinal cord: Different effects of resiniferatoxin and bupivacaine on spinal microglial changes after spared nerve injury. *Mol Pain* 2009; 5:53
  65. Costigan M, Moss A, Latremoliere A, Johnston C, Verma-Gandhu M, Herbert TA, Barrett L, Brenner GJ, Vardeh D, Woolf CJ, Fitzgerald M: T-cell infiltration and signaling in the adult dorsal spinal cord is a major contributor to neuropathic pain-like hypersensitivity. *J Neurosci* 2009; 29:14415–22
  66. Peters CM, Eisenach JC: Contribution of the chemokine (C-C motif) ligand 2 (CCL2) to mechanical hypersensitivity after surgical incision in rats. *ANESTHESIOLOGY* 2010; 112:1250–8

## ANESTHESIOLOGY REFLECTIONS FROM THE WOOD LIBRARY-MUSEUM

### Slocum's Cocaine "Surprise" for Johnson Pillmore, M.D.

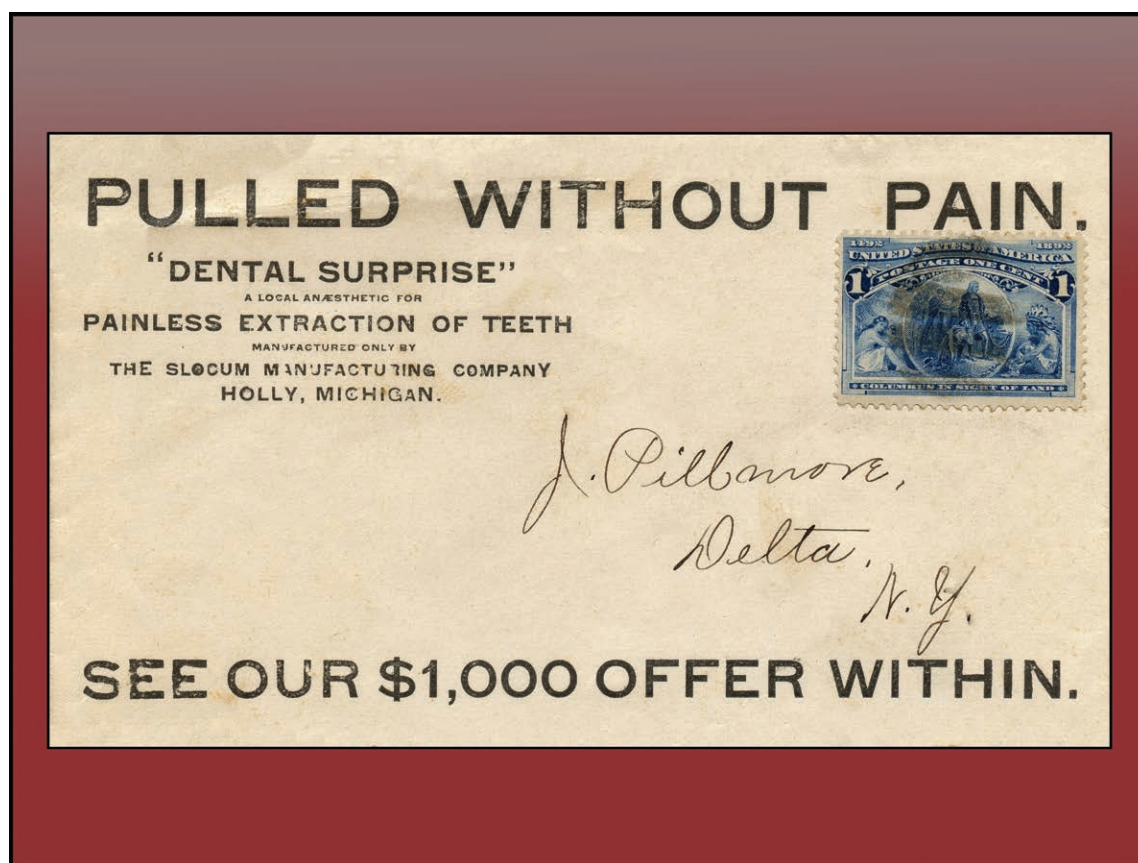

From the Wood Library-Museum's Ben Z. Swanson Collection, this illegibly postmarked cover (above) was sent to Johnson Pillmore, M.D., of Delta, New York. Fortunately, the "Columbus in Sight of Land" 1-cent stamp from the Columbian Issue assists us in dating this item. From Holly, Michigan, the Slocum Manufacturing Company was taking advantage of the 1893 World's Columbian Exposition to advertise "Dental Surprise," their new (?) "local anesthetic for painless extraction of teeth." Suspicious of the novelty of Slocum's wares, the journal editor of the *Dental Cosmos* forwarded a sample of "Dental Surprise" in 1893 to S. P. Sadtler, Ph.D., a professor at the Philadelphia College of Pharmacy. Sadtler's chemical analysis unmasked "Dental Surprise" as merely carbolic acid fortified with 1.46% "Anhydrous Cocain Hydrochlorate." (Copyright © the American Society of Anesthesiologists' Wood Library-Museum of Anesthesiology.)

George S. Bause, M.D., M.P.H., *Honorary Curator and Laureate of the History of Anesthesia*, Wood Library-Museum of Anesthesiology, Schaumburg, Illinois, and *Clinical Associate Professor*, Case Western Reserve University, Cleveland, Ohio. [UJYC@aol.com](mailto:UJYC@aol.com).
